# Supplementary material for: A prospective study on an innovative online forum for peer reviewing of surgical science
Source: PLoS One. 2017 Jun 29;12(6):e0179031. doi: 10.1371/journal.pone.0179031 (PMC5491000; doi:10.1371/journal.pone.0179031)
Supplement: S3 Data — xlsx. (XLSX) [file pone.0179031.s007.xlsx]

## Sheet: Special Reject
Manuscript no.	Sent to JJE	Out for S1M review?
BJS-0446-Mar-15	2015-04-02	No
BJS-0475-Apr-15	2015-04-09	No
BJS-0480-Apr-15	2015-04-09	No
BJS-0485-Apr-15	2015-04-09	No
BJS-0506-Apr-15	2015-04-09	No
BJS-0491-Apr-15	2015-04-16	No
BJS-0514-Apr-15	2015-04-16	No
BJS-0524-Apr-15	2015-04-16	No
BJS-0526-Apr-15	2015-04-16	No
BJS-0549-Apr-15	2015-04-16	No
BJS-0518-Apr-15	2015-04-16	No
BJS-0483-Apr-15	2015-04-16	No
BJS-0484-Apr-15	2015-04-16	No
BJS-0556-Apr-15	2015-04-24	No
BJS-0553-Apr-15	2015-04-24	No
BJS-0582-Apr-15	2015-04-24	No
BJS-0587-Apr-15	2015-04-24	No
BJS-0589-Apr-15	2015-04-24	No
BJS-0551-Apr-15	2015-05-06	No
BJS-0588-Apr-15	2015-04-30	No
BJS-0604-Apr-15	2015-04-30	No
BJS-0615-Apr-15	2015-05-06	No
BJS-0642-May-15	2015-05-06	No
BJS-0660-May-15	2015-05-14	No
BJS-0664-May-15	2015-05-14	No
BJS-0613-Apr-15	2015-05-06	No
BJS-0641-May-15	2015-05-14	No
BJS-0650-May-15	2015-05-14	No
BJS-0670-May-15	2015-05-14	No
BJS-0662-May-15	2015-05-14	No
BJS-0568-Apr-15	2015-05-14	No
BJS-0654-May-15	2015-05-14	No
BJS-0592-Apr-15	2015-05-06	No
BJS-0645-May-15	2015-05-14	No
BJS-0661-May-15	2015-05-14	No
BJS-0648-May-15	2015-05-14	No
BJS-0673-May-15	2015-05-14	No
BJS-0695-May-15	2015-05-21	No
BJS-0692-May-15	2015-05-21	No
BJS-0705-May-15	2015-05-21	No
BJS-0691-May-15	2015-05-21	No
BJS-0693-May-15	2015-05-21	No
BJS-0764-May-15	2015-05-28	No

## Sheet: Complete
Manuscript no.	Sent to JJE	Out for S1M review?	Sent for open review	Stopped	Number of responses	Sent to eds	Regular decision	Regular Report Scores					Open Report Scores
BJS-0471-Apr-15	2015-04-02	Yes	2015-04-14	2015-05-05	3	2015-05-12	Reject	3 - Adequate	4 - Good				2 - Inadequate	2 - Inadequate	3 - Adequate
BJS-0473-Apr-15	2015-04-09	Yes	2015-04-14	2015-05-05	8	2015-05-12	Reject	3 - Adequate	3 - Adequate	3 - Adequate			3 - Adequate	2 - Inadequate	2 - Inadequate	1 - Cursory	2 - Inadequate	1 - Cursory	3 - Adequate	1 - Cursory
BJS-0474-Apr-15	2015-04-09	Yes	2015-04-14	2015-05-05	5	2015-05-12	Major revision	4 - Good	4 - Good	3 - Adequate			3 - Adequate	1 - Cursory	1 - Cursory	1 - Cursory	2 - Inadequate
BJS-0478-Apr-15	2015-04-09	Yes	2015-04-14	2015-05-05	4	2015-05-12	Reject	3 - Adequate	3 - Adequate				4 - Good	3 - Adequate	2 - Inadequate	3 - Adequate
BJS-0479-Apr-15	2015-04-09	Yes	2015-04-14	2015-05-05	4	2055-05-26	Reject	4 - Good	4 - Good	3 - Adequate			2 - Inadequate	2 - Inadequate	3 - Adequate	3 - Adequate
BJS-0481-Apr-15	2015-04-09	Yes	2015-04-14	2015-05-05	10	2015-05-12	Reject	3 - Adequate	2 - Inadequate	3 - Adequate			2 - Inadequate	3 - Adequate	2 - Inadequate	1 - Cursory	3 - Adequate	4 - Good	1 - Cursory	4 - Good	3 - Adequate	1 - Cursory
BJS-0487-Apr-15	2015-04-09	Yes	2015-04-14	2015-05-05	2	2015-05-18	Reject	3 - Adequate	3 - Adequate	3 - Adequate			2 - Inadequate	2 - Inadequate
BJS-0490-Apr-15	2015-04-16	Yes	2015-04-30	2015-05-21	3	2015-05-27	Major Revision	5 - Outstanding	5 - Outstanding				2 - Inadequate	2 - Inadequate	4 - Good
BJS-0492-Apr-15	2015-04-09	Yes	2015-04-14	2015-05-05	4	2015-05-12	Reject	3 - Adequate	2 - Inadequate	3 - Adequate			3 - Adequate	2 - Inadequate	3 - Adequate	2 - Inadequate
BJS-0496-Apr-15	2015-04-09	Yes	2015-04-14	2015-05-05	2	2015-05-12	Reject	5 - Outstanding	4 - Good				2 - Inadequate	4 - Good
BJS-0500-Apr-15	2015-04-09	Yes	2015-04-14	2015-05-05	1	2015-05-12	Reject	4 - Good	5 - Outstanding				2 - Inadequate
BJS-0505-Apr-15	2015-04-09	Yes	2015-04-14	2015-05-05	3	2015-05-12	Major revision	4 - Good	4 - Good	5 - Outstanding	2 - Inadequate		4 - Good	1 - Cursory	2 - Inadequate
BJS-0508-Apr-15	2015-04-09	Yes	2015-04-14	2015-05-05	2	2015-05-12	Reject	3 - Adequate	3 - Adequate				2 - Inadequate	2 - Inadequate
BJS-0512-Apr-15	2015-04-09	Yes	2015-04-14	2015-05-05	1	2015-05-26	Reject	3 - Adequate	3 - Adequate				2 - Inadequate
BJS-0516-Apr-15	2015-04-16	Yes	2015-04-30	2015-05-21	2	2015-05-27	Reject	4 - Good					3 - Adequate	2 - Inadequate
BJS-0520-Apr-15	2015-04-16	Yes	2015-04-30	2015-05-21	4	2015-05-27	Reject	3 - Adequate	3 - Adequate				2 - Inadequate	1 - Cursory	2 - Inadequate	1 - Cursory
BJS-0521-Apr-15	2015-04-16	Yes	2015-04-30	2015-05-21	2	2015-05-27	Reject	3 - Adequate	3 - Adequate				3 - Adequate	1 - Cursory
BJS-0525-Apr-15	2015-04-16	Yes	2015-04-30	2015-05-21	2	2015-05-27	Revision	4 - Good	3 - Adequate				3 - Adequate	2 - Inadequate
BJS-0532-Apr-15	2015-04-16	Yes	2015-04-30	2015-05-21	1	2015-05-27	Reject	3 - Adequate	4 - Good				3 - Adequate
BJS-0537-Apr-15	2015-04-16	Yes	2015-04-30	2015-05-21	2	2015-05-27	Reject	5 - Outstanding	3 - Adequate				4 - Good	3 - Adequate
BJS-0540-Apr-15	2015-04-16	Yes	2015-04-30	2015-05-21	1	2015-05-27	Reject	4 - Good	4 - Good				1 - Cursory
BJS-0541-Apr-15	2015-04-16	Yes	2015-04-30	2015-05-21	1	2015-05-27	Reject	4 - Good	4 - Good	3 - Adequate	5 - Outstanding		2 - Inadequate
BJS-0544-Apr-15	2015-04-16	Yes	2015-04-30	2015-05-21	2	2015-06-02	Reject	4 - Good	4 - Good				1 - Cursory	1 - Cursory
BJS-0545-Apr-15	2015-04-24	Yes	2015-05-12	2015-06-02	5	2015-06-09	Reject	4 - Good	4 - Good				3 - Adequate	0 - No report	4 - Good	3 - Adequate	3 - Adequate
BJS-0546-Apr-15	2015-04-16	Yes	2015-04-30	2015-05-21	1	2015-05-27	Reject	3 - Adequate	3 - Adequate	4 - Good			2 - Inadequate
BJS-0563-Apr-15	2015-04-24	Yes	2015-05-12	2015-06-02	1	2015-06-30	Reject	4 - Good	4 - Good				2 - Inadequate
BJS-0579-Apr-15	2015-04-24	Yes	2015-05-12	2015-06-02	1	2015-06-09	Reject	4 - Good	4 - Good				3 - Adequate
BJS-0580-Apr-15	2015-04-24	Yes	2015-05-12	2015-06-02	1	2015-06-09	Reject	3 - Adequate	1 - Cursory	3 - Adequate	3 - Adequate
BJS-0583-Apr-15	2015-04-24	Yes	2015-05-12	2015-06-02	4	2015-06-09	Major revision	3 - Adequate	2 - Inadequate	4 - Good			3 - Adequate	4 - Good	2 - Inadequate	3 - Adequate
BJS-0598-Apr-15	2015-04-30	Yes	2015-05-12	2015-06-02	2	2015-06-09	Reject	3 - Adequate	3 - Adequate				3 - Adequate	2 - Inadequate
BJS-0612-Apr-15	2015-04-30	Yes	2015-05-12	2015-06-02	1	2015-06-09	Reject	3 - Adequate	3 - Adequate	2 - Inadequate	3 - Adequate	4 - Good	4 - Good
BJS-0621-Apr-15	2015-05-06	Yes	2015-05-26	2015-06-16	1	2015-06-23	Reject	3 - Adequate	3 - Adequate	5 - Outstanding			3 - Adequate
BJS-0623-Apr-15	2015-05-06	Yes	2015-05-12	2015-06-02	1	2015-06-17	Major revision	4 - Good	3 - Adequate	5 - Outstanding			4 - Good
BJS-0632-May-15	2015-05-06	Yes	2015-05-12	2015-06-02	1	2015-06-19	Reject	3 - Adequate	3 - Adequate	3 - Adequate			2 - Inadequate
BJS-0635-May-15	2015-05-06	Yes	2015-05-12	2015-06-02	1	2015-06-19	Reject	1 - Cursory	3 - Adequate	3 - Adequate	3 - Adequate		3 - Adequate
BJS-0640-May-15	2015-05-06	Yes	2015-05-12	2015-06-02	1	2015-06-09	Reject	4 - Good	4 - Good	4 - Good	3 - Adequate		2 - Inadequate
BJS-0646-May-15	2015-05-14	Yes	2015-05-26	2015-06-16	1	2015-06-23	Reject	4 - Good	3 - Adequate				2 - Inadequate
BJS-0649-May-15	2015-05-14	Yes	2015-05-26	2015-06-16	1	2015-06-23	Reject	4 - Good	4 - Good	2 - Inadequate	3 - Adequate		3 - Adequate
BJS-0652-May-15	2015-05-14	Yes	2015-05-26	2015-06-16	2	2015-06-23	Reject	4 - Good	3 - Adequate				2 - Inadequate	2 - Inadequate
BJS-0655-May-15	2015-05-14	Yes	2015-05-26	2015-06-16	1	2015-06-23	Reject	3 - Adequate	3 - Adequate	3 - Adequate			2 - Inadequate
BJS-0656-May-15	2015-05-14	Yes	2015-05-26	2015-06-16	2	2015-07-23	Reject	3 - Adequate	4 - Good				2 - Inadequate	2 - Inadequate
BJS-0669-May-15	2015-05-14	Yes	2015-05-26	2015-06-16	1	2015-06-23	Reject	4 - Good	4 - Good				3 - Adequate
BJS-0704-May-15	2015-05-21	Yes	2015-05-26	2015-06-16	1	2015-07-08	Reject	4 - Good	4 - Good	4 - Good			3 - Adequate
BJS-0728-May-15	2015-05-28	Yes	2015-06-09	2015-06-30	1	2015-07-23	Reject	5 - Outstanding	4 - Good				2 - Inadequate

## Sheet: No reviews
Manuscript no.	Sent to JJE	Out for S1M review?	Sent for open review	Stopped	Number of responses
BJS-0313-Mar-15	2015-04-30	Yes	2015-05-12	2015-06-02	0	2015-06-09	Reject
BJS-0523-Apr-15	2015-04-16	Yes	2015-04-30	2015-05-21	0	2015-05-28	Reject
BJS-0527-Apr-15	2015-04-16	Yes	2015-04-30	2015-05-21	0	2015-05-28	Reject
BJS-0529-Apr-15	2015-04-16	Yes	2015-04-30	2015-05-21	0	2015-05-28	Reject
BJS-0535-Apr-15	2015-04-16	Yes	2015-04-30	2015-05-21	0	2015-05-28	Reject
BJS-0543-Apr-15	2015-04-16	Yes	2015-04-30	2015-05-21	0	2015-05-28	Reject
BJS-0555-Apr-15	2015-04-24	Yes	2015-05-12	2015-06-02	0	2015-06-09	Reject
BJS-0559-Apr-15	2015-04-24	Yes	2015-05-12	2015-06-02	0	2015-06-09	Reject
BJS-0560-Apr-15	2015-04-24	Yes	2015-05-12	2015-06-02	0	2015-06-09	Reject
BJS-0561-Apr-15	2015-04-24	Yes	2015-05-12	2015-06-02	0	2015-06-09	Reject
BJS-0564-Apr-15	2015-04-24	Yes	2015-05-12	2015-06-02	0	2015-06-09	Reject
BJS-0565-Apr-15	2015-04-24	Yes	2015-05-12	2015-06-02	0	2015-06-09	Reject
BJS-0569-Apr-15	2015-04-24	Yes	2015-05-12	2015-06-02	0	2015-06-09	Reject
BJS-0570-Apr-15	2015-04-24	Yes	2015-05-12	2015-06-02	0	2015-06-09	Reject
BJS-0572-Apr-15	2015-04-24	Yes	2015-05-12	2015-06-02	0	2015-06-09	Reject
BJS-0574-Apr-15	2015-04-24	Yes	2015-05-12	2015-06-02	0	2015-06-09	Reject
BJS-0576-Apr-15	2015-04-24	Yes	2015-05-12	2015-06-02	0	2015-06-09	Reject
BJS-0577-Apr-15	2015-04-24	Yes	2015-05-12	2015-06-02	0	2015-06-09	Reject
BJS-0581-Apr-15	2015-04-24	Yes	2015-05-12	2015-06-02	0	2015-06-09	Reject
BJS-0584-Apr-15	2015-04-24	Yes	2015-05-12	2015-06-02	0	2015-06-09	Reject
BJS-0595-Apr-15	2015-05-14	Yes	2015-05-26	2015-06-16	0	2015-06-23	Reject
BJS-0597-Apr-15	2015-04-30	Yes	2015-05-12	2015-06-02	0	2015-06-09	Reject
BJS-0601-Apr-15	2015-04-30	Yes	2015-05-12	2015-06-02	0	2015-06-09	Reject
BJS-0603-Apr-15	2015-04-30	Yes	2015-05-12	2015-06-02	0	2015-06-09	Reject
BJS-0608-Apr-15	2015-05-06	Yes	2015-05-12	2015-06-02	0	2015-06-09	Reject
BJS-0610-Apr-15	2015-04-30	Yes	2015-05-12	2015-06-02	0	2015-06-09	Reject
BJS-0614-Apr-15	2015-04-30	Yes	2015-05-12	2015-06-02	0	2015-06-09	Reject
BJS-0617-Apr-15	2015-04-30	Yes	2015-05-12	2015-06-02	0	2015-06-09	Major revision
BJS-0618-Apr-15	2015-04-30	Yes	2015-05-12	2015-06-02	0	2015-06-09	Reject
BJS-0631-May-15	2015-05-06	Yes	2015-05-12	2015-06-02	0	2015-06-09	Reject
BJS-0633-May-15	2015-05-21	Yes	2015-05-26	2015-06-16	0	2015-06-23	Reject
BJS-0634-May-15	2015-05-06	Yes	2015-05-12	2015-06-02	0	2015-06-09	Reject
BJS-0657-May-15	2015-05-14	Yes	2015-05-26	2015-06-16	0	2015-06-23	Reject
BJS-0659-May-15	2015-05-21	Yes	2015-05-26	2015-06-16	0	2015-06-23	Reject
BJS-0666-May-15	2015-05-14	Yes	2015-05-26	2015-06-16	0	2015-06-23	Reject
BJS-0674-May-15	2015-05-14	Yes	2015-05-26	2015-06-16	0	2015-06-23	Reject
BJS-0676-May-15	2015-05-14	Yes	2015-05-26	2015-06-16	0	2015-06-23	Reject
BJS-0677-May-15	2015-05-14	Yes	2015-05-26	2015-06-16	0	2015-06-23	Reject
BJS-0680-May-15	2015-05-14	Yes	2015-05-26	2015-06-16	0	2015-06-23	Reject
BJS-0682-May-15	2015-05-14	Yes	2015-05-26	2015-06-16	0	2015-06-23	Major revision
BJS-0684-May-15	2015-05-14	Yes	2015-05-26	2015-06-16	0	2015-06-23	Reject
BJS-0686-May-15	2015-05-21	Yes	2015-05-26	2015-06-16	0	2015-06-23	Reject
BJS-0687-May-15	2015-05-21	Yes	2015-05-26	2015-06-16	0	2015-06-23	Reject
BJS-0688-May-15	2015-05-21	Yes	2015-05-26	2015-06-16	0	2015-06-23	Reject
BJS-0689-May-15	2015-05-21	Yes	2015-05-26	2015-06-16	0	2015-06-23	Reject
BJS-0694-May-15	2015-05-21	Yes	2015-05-26	2015-06-16	0	2015-06-23	Reject
BJS-0697-May-15	2015-05-21	Yes	2015-06-09	2015-06-30	0	2015-07-07	Reject
BJS-0702-May-15	2015-05-21	Yes	2015-05-26	2015-06-16	0	2015-06-23	Reject
BJS-0706-May-15	2015-05-21	Yes	2015-05-26	2015-06-16	0	2015-06-23	Reject
BJS-0708-May-15	2015-05-21	Yes	2015-05-26	2015-06-16	0	2015-06-23	Major revision
BJS-0710-May-15	2015-05-21	Yes	2015-05-26	2015-06-16	0	2015-06-23	Major revision
BJS-0712-May-15	2015-05-28	Yes	2015-06-09	2015-06-30	0	2015-07-07	Reject
BJS-0715-May-15	2015-05-21	Yes	2015-05-26	2015-06-16	0	2015-06-23	Reject
BJS-0717-May-15	2015-05-28	Yes	2015-06-09	2015-06-30	0	2015-07-07	Reject
BJS-0719-May-15	2015-05-21	Yes	2015-06-09	2015-06-30	0	2015-07-07	Reject
BJS-0725-May-15	2015-05-28	Yes	2015-06-09	2015-06-30	0	2015-07-07	Reject
BJS-0726-May-15	2015-05-28	Yes	2015-06-09	2015-06-30	0	2015-07-07	Reject
BJS-0727-May-15	2015-05-28	Yes	2015-06-09	2015-06-30	0	2015-07-07	Reject
BJS-0731-May-15	2015-05-28	Yes	2015-06-09	2015-06-30	0	2015-07-07	Major revision
BJS-0738-May-15	2015-05-28	Yes	2015-06-09	2015-06-30	0	2015-07-07	Reject
BJS-0742-May-15	2015-05-28	Yes	2015-06-09	2015-06-30	0	2015-07-07	Reject
BJS-0749-May-15	2015-05-28	Yes	2015-06-09	2015-06-30	0	2015-07-07	Reject
BJS-0751-May-15	2015-05-28	Yes	2015-06-09	2015-06-30	0	2015-07-07	Reject
BJS-0754-May-15	2015-05-28	Yes	2015-06-09	2015-06-30	0	2015-07-07	Reject
BJS-0756-May-15	2015-05-28	Yes	2015-06-09	2015-06-30	0	2015-07-07	Reject
BJS-0761-May-15	2015-05-28	Yes	2015-06-09	2015-06-30	0	2015-07-07	Major revision
